# Supplementary material for: Toward Better Risk Stratification for Implantable Cardioverter-Defibrillator Recipients: Implications of Explainable Machine Learning Models
Source: MDPI journal article supplement (doi:10.3390/jcdd9090310), 2022-09-17
Supplement: s1 [file s1]

# **Toward better risk stratification for implantable cardioverter-defibrillator recipients: implications of explainable machine learning models**

## **Supplementary material**

**Authors:** Yu Deng\*, MD; Sijing Cheng\*, MD; Hao Huang\*, MD; Xi Liu, MD; Yu Yu, MD; Min Gu, MD; Chi Cai, MD; Xuhua Chen, MD; Hongxia Niu, MD; Wei Hua, MD, Ph.D., FHRS

\*These authors contributed equally to this work

**Affiliation:** The Cardiac Arrhythmia Center, State Key Laboratory of Cardiovascular Disease, Fuwai Hospital, National Center for Cardiovascular Diseases, Chinese Academy of Medical Sciences & Peking Union Medical College, No.167 North Lishi Road, Beijing 100037, China

### **Correspondence:**

Wei Hua, Ph.D.; email: huawei@fuwai.com

**Table S1.** Distribution and proportion of missing variables.

**Table S2.** Data before and after Box-Cox transformation and standardization.

**Table S3.** Model performance in the training test.

**Table S4.** Univariable and multivariable Cox regression of all-cause death and first appropriate shock.

**Table S5.** Parameter search space for each model in sensitivity analysis.

**Figure S1.** Continuous variables' contribution to the outcome in the XGBoost model predicting all-cause death.

**Figure S2.** Continuous variables' contribution to the outcome in the SSVM model predicting the first appropriate shock.

**Figure S3.** Model interpretability using SHAP values.

**Figure S4.** Comparison of C-index between CPH and ML algorithms in sensitivity analysis.

**Figure S5.** Model interpretability using SHAP values in sensitivity analysis.

**Table S1.** Distribution and proportion of missing variables.

| <b>Variables</b> | <b>Number of missing values</b> | <b>Percentage (%)</b> |
|------------------|---------------------------------|-----------------------|
| RVD              | 34                              | 3.8                   |
| hs-CRP           | 33                              | 3.7                   |
| NT-proBNP        | 21                              | 2.4                   |
| IVS              | 14                              | 1.6                   |
| Body mass index  | 13                              | 1.5                   |
| Age              | 5                               | 0.6                   |
| LAD              | 4                               | 0.5                   |
| Hemoglobin       | 3                               | 0.3                   |
| Systolic BP      | 1                               | 0.1                   |
| Diastolic BP     | 1                               | 0.1                   |
| Creatinine       | 1                               | 0.1                   |
| BUN              | 1                               | 0.1                   |
| Heart rate       | 1                               | 0.1                   |
| LVEDD            | 1                               | 0.1                   |

BP, blood pressure; BUN, blood urea nitrogen; hs-CRP, high-sensitivity C-reactive protein; IVS, interventricular septum thickness; LAD, left atrial diameter; LVEDD, left ventricular end-diastolic diameter; NT-proBNP, N-terminal pro-brain natriuretic peptide; RVD, right ventricular diameter.

**Table S2.** Data before and after Box-Cox transformation and standardization.

| Transformed value                          | -2    | -1    | 0     | 1      | 2      | ___ |
|--------------------------------------------|-------|-------|-------|--------|--------|-----|
| Original value                             |       |       |       |        |        |     |
| <b>Dataset for all-cause death</b>         |       |       |       |        |        |     |
| Age (years)                                | 30.1  | 47.3  | 60.4  | 71.5   | 81.4   |     |
| Body mass index (kg/m2)                    | 18.3  | 21.3  | 24.7  | 28.3   | 32.2   |     |
| Systolic BP (mmHg)                         | 91.3  | 104.6 | 119.8 | 137.1  | 156.8  |     |
| Diastolic BP (mmHg)                        | 53.5  | 63.7  | 73.8  | 83.9   | 93.9   |     |
| NT-proBNP (pg/mL)                          | 30.2  | 175.5 | 751.5 | 2597.0 | 7653.8 |     |
| Creatinine (μmol/L)                        | 54.6  | 67.9  | 87.5  | 118.9  | 175.1  |     |
| BUN (mmol/L)                               | 3.3   | 4.6   | 6.7   | 10.0   | 15.4   |     |
| hs-CRP (mg/L)                              | 0.1   | 0.5   | 2.1   | 6.8    | 17.4   |     |
| Hemoglobin (g/L)                           | 103.5 | 122.3 | 140.4 | 157.9  | 175.0  |     |
| Heart rate (beats per minute)              | 46.9  | 55.8  | 67.0  | 81.4   | 99.9   |     |
| LAD (mm)                                   | 29.0  | 34.8  | 41.8  | 50.2   | 60.3   |     |
| IVS (mm)                                   | 6.2   | 7.5   | 9.1   | 11.3   | 14.3   |     |
| LVEDD (mm)                                 | 40.5  | 49.6  | 59.8  | 71.2   | 83.7   |     |
| LVEF (%)                                   | 18.6  | 28.9  | 41.8  | 57.4   | 75.9   |     |
| RVD (mm)                                   | 16.4  | 18.7  | 21.9  | 26.3   | 32.7   |     |
| <b>Dataset for first appropriate shock</b> |       |       |       |        |        |     |
| Age (years)                                | 29.2  | 46.7  | 60.1  | 71.6   | 81.8   |     |
| Body mass index (kg/m2)                    | 18.2  | 21.2  | 24.5  | 28.4   | 32.7   |     |
| Systolic BP (mmHg)                         | 90.0  | 104.0 | 119.8 | 137.6  | 157.5  |     |
| Diastolic BP (mmHg)                        | 52.5  | 63.0  | 73.5  | 83.9   | 94.4   |     |

|                               |       |       |       |        |        |
|-------------------------------|-------|-------|-------|--------|--------|
| NT-proBNP (pg/mL)             | 30.1  | 171.8 | 740.9 | 2607.8 | 7873.5 |
| Creatinine (μmol/L)           | 54.2  | 67.7  | 87.6  | 118.5  | 171.3  |
| BUN (mmol/L)                  | 3.2   | 4.5   | 6.6   | 10.0   | 15.6   |
| hs-CRP (mg/L)                 | 0.1   | 0.5   | 2.1   | 6.6    | 16.4   |
| Hemoglobin (g/L)              | 102.6 | 122.7 | 141.4 | 159.0  | 175.7  |
| Heart rate (beats per minute) | 46.6  | 55.7  | 67.1  | 81.5   | 99.9   |
| LAD (mm)                      | 28.5  | 34.5  | 41.7  | 50.2   | 60.4   |
| IVS (mm)                      | 6.2   | 7.4   | 9.1   | 11.4   | 14.7   |
| LVEDD (mm)                    | 40.1  | 49.0  | 59.3  | 70.9   | 84.1   |
| LVEF (%)                      | 17.6  | 28.7  | 42.2  | 58.2   | 76.4   |
| RVD (mm)                      | 16.3  | 18.7  | 21.9  | 26.5   | 33.6   |

Of note, data preprocessing was independent for the modeling process of all-cause death and appropriate shock. Therefore, transformed values were not necessarily the same in these two datasets.

LVEF, left ventricular ejection fraction; other abbreviations as in Supplemental Table S1.

**Table S3.** Model performance in the training test

| Outcome events                     | Algorithms          |                     |                     |                     |                     |
|------------------------------------|---------------------|---------------------|---------------------|---------------------|---------------------|
|                                    | CPH                 | EN-Cox              | RSF                 | SSVM                | XGBoost             |
| <b>Primary analysis</b>            |                     |                     |                     |                     |                     |
| <b>All-cause death</b>             | 0.795 (0.755-0.825) | 0.784 (0.744-0.819) | 0.852 (0.819-0.881) | 0.765 (0.728-0.800) | 0.831 (0.796-0.867) |
| <b>The first appropriate shock</b> | 0.644 (0.607-0.688) | 0.652 (0.615-0.693) | 0.818 (0.788-0.848) | 0.708 (0.673-0.741) | 0.715 (0.681-0.754) |
| <b>Sensitivity analysis</b>        |                     |                     |                     |                     |                     |
| <b>All-cause death</b>             | 0.793 (0.753-0.823) | 0.781 (0.741-0.816) | 0.874 (0.846-0.898) | 0.764 (0.728-0.798) | 0.823 (0.791-0.860) |
| <b>The first appropriate shock</b> | 0.644 (0.607-0.687) | 0.642 (0.606-0.676) | 0.842 (0.818-0.865) | 0.697 (0.663-0.730) | 0.713 (0.678,0.755) |

Values are presented as the mean (95% confidence interval).

CPH, Cox proportional hazards; EN-Cox, elastic net Cox regression; RSF, random survival forests; SSVM, survival support vector machine; XGBoost, extreme gradient boosting.

**Table S4.** Univariable and multivariable Cox regression of all-cause death and first appropriate shock.

| Characteristic                 | all-cause death |         |               |         | First appropriate shock |         |               |         |
|--------------------------------|-----------------|---------|---------------|---------|-------------------------|---------|---------------|---------|
|                                | univariable     |         | multivariable |         | univariable             |         | multivariable |         |
|                                | Hazard Ratio    | p-value | Hazard Ratio  | p-value | Hazard Ratio            | p-value | Hazard Ratio  | p-value |
| Age                            | 1.36            | <0.001  | 1.24          | 0.021   | 0.86                    | 0.033   | 0.87          | 0.069   |
| Male sex                       | 1.47            | 0.064   |               |         | 2.19                    | <0.001  | 1.68          | 0.011   |
| Body mass index                | 0.94            | 0.454   |               |         | 0.99                    | 0.879   |               |         |
| Ischemic etiology              | 1.24            | 0.201   |               |         | 0.76                    | 0.06    |               |         |
| Family history of sudden death | 0.72            | 0.579   |               |         | 0.62                    | 0.418   |               |         |
| Smoking                        | 1.19            | 0.29    |               |         | 1.44                    | 0.01    |               |         |
| Primary prevention             | 1.51            | 0.018   |               |         | 0.67                    | 0.029   | 0.53          | <0.001  |
| Dual-chamber ICD               | 0.97            | 0.883   |               |         | 0.67                    | 0.013   | 0.73          | 0.049   |
| Systolic BP                    | 0.81            | 0.014   |               |         | 0.78                    | <0.001  | 0.83          | 0.021   |
| Diastolic BP                   | 0.85            | 0.038   | 0.87          | 0.088   | 0.98                    | 0.727   |               |         |
| NYHA class                     | 2.43            | <0.001  | 1.53          | <0.001  | 1.3                     | 0.001   |               |         |
| LVEDD                          | 2.05            | <0.001  | 1.44          | 0.002   | 1.44                    | <0.001  | 1.23          | 0.031   |
| LVEF                           | 0.51            | <0.001  |               |         | 0.76                    | <0.001  |               |         |
| LAD                            | 1.96            | <0.001  | 1.22          | 0.086   | 1.33                    | <0.001  | 1.19          | 0.044   |
| IVS                            | 0.97            | 0.702   |               |         | 1.05                    | 0.548   |               |         |
| RVD                            | 1.28            | 0.004   |               |         | 1.14                    | 0.071   |               |         |
| Tricuspid valve regurgitation  | 1.59            | 0.067   | 0.63          | 0.1     | 0.89                    | 0.625   |               |         |
| Mitral valve regurgitation     | 2.6             | <0.001  |               |         | 1.44                    | 0.034   |               |         |

|                          |      |        |      |        |      |       |
|--------------------------|------|--------|------|--------|------|-------|
| Heart rate               | 1.08 | 0.348  |      |        | 1.11 | 0.118 |
| CLBBB                    | 1.06 | 0.879  |      |        | 0.75 | 0.398 |
| CRBBB                    | 2.39 | <0.001 | 2.16 | 0.005  | 0.61 | 0.237 |
| Frequent PVCs            | 1.37 | 0.054  |      |        | 1.06 | 0.669 |
| Pacing indication        | 1.61 | 0.079  | 1.56 | 0.111  | 0.81 | 0.469 |
| Myocardial infarction    | 1.31 | 0.105  |      |        | 0.78 | 0.109 |
| Atrial fibrillation      | 2.1  | <0.001 |      |        | 1.49 | 0.007 |
| Hypertension             | 1.07 | 0.662  |      |        | 0.8  | 0.122 |
| Diabetes                 | 2.02 | <0.001 | 1.35 | 0.119  | 0.9  | 0.606 |
| Hyperlipidemia           | 1.13 | 0.456  |      |        | 0.89 | 0.43  |
| Stroke                   | 2.36 | 0.001  |      |        | 1.45 | 0.136 |
| Hyperuricemia            | 1.16 | 0.584  |      |        | 1.26 | 0.361 |
| NT-proBNP                | 2.51 | <0.001 | 1.74 | <0.001 | 1.17 | 0.04  |
| Hemoglobin               | 0.89 | 0.157  |      |        | 1.16 | 0.035 |
| Creatinine               | 1.52 | <0.001 |      |        | 1.17 | 0.025 |
| BUN                      | 1.56 | <0.001 |      |        | 1.09 | 0.233 |
| hs-CRP                   | 1.45 | <0.001 |      |        | 1.1  | 0.196 |
| ACEI/ARB/ARNI            | 1.11 | 0.528  |      |        | 1.31 | 0.078 |
| Amiodarone               | 1.05 | 0.765  |      |        | 1.46 | 0.009 |
| Beta-blockers            | 1.27 | 0.334  |      |        | 0.98 | 0.918 |
| Calcium channel blockers | 0.83 | 0.493  |      |        | 0.87 | 0.561 |
| Diuretics                | 2.83 | <0.001 |      |        | 1.58 | 0.003 |
| MRA                      | 1.94 | <0.001 |      |        | 1.53 | 0.004 |
| Digitalis                | 2.24 | <0.001 |      |        | 1.26 | 0.164 |
| Statin                   | 1.07 | 0.686  |      |        | 0.86 | 0.28  |
| Antiplatelet             | 1.08 | 0.644  |      |        | 0.86 | 0.312 |

|                |      |        |      |       |      |       |
|----------------|------|--------|------|-------|------|-------|
| Anticoagulants | 2.05 | <0.001 | 1.39 | 0.112 | 1.46 | 0.029 |
|----------------|------|--------|------|-------|------|-------|

Note: all continuous variables were processed with Box-Cox transformation and standardization; one unit change is illustrated in Supplemental Table S2.

ACEI/ARB/ARNI, angiotensin-converting enzyme inhibitor/angiotensin receptor blocker/angiotensin receptor-neprilysin inhibitor; CLBBB, complete left bundle branch block; CRBBB, complete right bundle branch block; ICD, implantable cardioverter-defibrillator; MRA, mineralocorticoid receptor antagonist; NYHA, New York Heart Association; PVC, premature ventricular contractions; other abbreviations as in Supplemental Tables S1 and 2.



**Table S5.** Parameter search space for each model in sensitivity analysis.

| <b>Algorithms</b> | <b>Parameter</b>                       | <b>Search space</b>                              | <b>Optimal<br/>Parameter<br/>for death<br/>prediction</b> | <b>Optimal<br/>Parameter<br/>for shock<br/>prediction</b> |
|-------------------|----------------------------------------|--------------------------------------------------|-----------------------------------------------------------|-----------------------------------------------------------|
| EN-Cox            | ll ratio                               | 0.1, 0.2, 0.3, 0.4, 0.5, 0.6, 0.7, 0.8, 0.9, 1.0 | 0.8                                                       | 0.1                                                       |
|                   | alpha                                  | Log distribution from 0.0001 to 1                | 0.0281                                                    | 0.1048                                                    |
| RSF               | number of trees                        | 100, 200, 300, 400, 500                          | 400                                                       | 500                                                       |
|                   | maximum depth                          | 2, 3, 4, 5, 6, 7                                 | 5                                                         | 6                                                         |
|                   | minimum samples required to split      | 10, 14, 28, 22, 40, 50                           | 14                                                        | 22                                                        |
|                   | minimum samples required at leaf nodes | 5, 7, 9, 11, 20, 25                              | 5                                                         | 7                                                         |
|                   |                                        |                                                  |                                                           |                                                           |
| SSVM              | alpha                                  | 0.1, 1, 10, 100                                  | 0.1                                                       | 0.1                                                       |
|                   | gamma                                  | 1, 0.1, 0.01, 0.001                              | 1                                                         | 0.001                                                     |
|                   | kernel                                 | rbf, poly, linear, sigmoid, cosine               | poly                                                      | poly                                                      |
|                   | degree (poly kernels only)             | 2, 3, 4, 5                                       | 4                                                         | 2                                                         |
| XGboost           | loss function                          | CoxPH                                            | -                                                         | -                                                         |
|                   | learning rate                          | 0.01, 0.05, 0.10                                 | 0.1                                                       | 0.1                                                       |
|                   | number of trees                        | 20, 25, 30                                       | 30                                                        | 30                                                        |
|                   | maximum depth                          | 1, 2                                             | 2                                                         | 2                                                         |
|                   | fraction of samples                    | 0.4, 0.5                                         | 0.4                                                       | 0.4                                                       |
|                   | fraction of features                   | 0.4, 0.5                                         | 0.4                                                       | 0.4                                                       |
|                   | minimum samples required to split      | 1, 2                                             | 1                                                         | 1                                                         |

Abbreviations as in Supplemental Tables S4.

**Figure S1.** Continuous variables' contribution to the outcome in the XGBoost model predicting all-cause death.

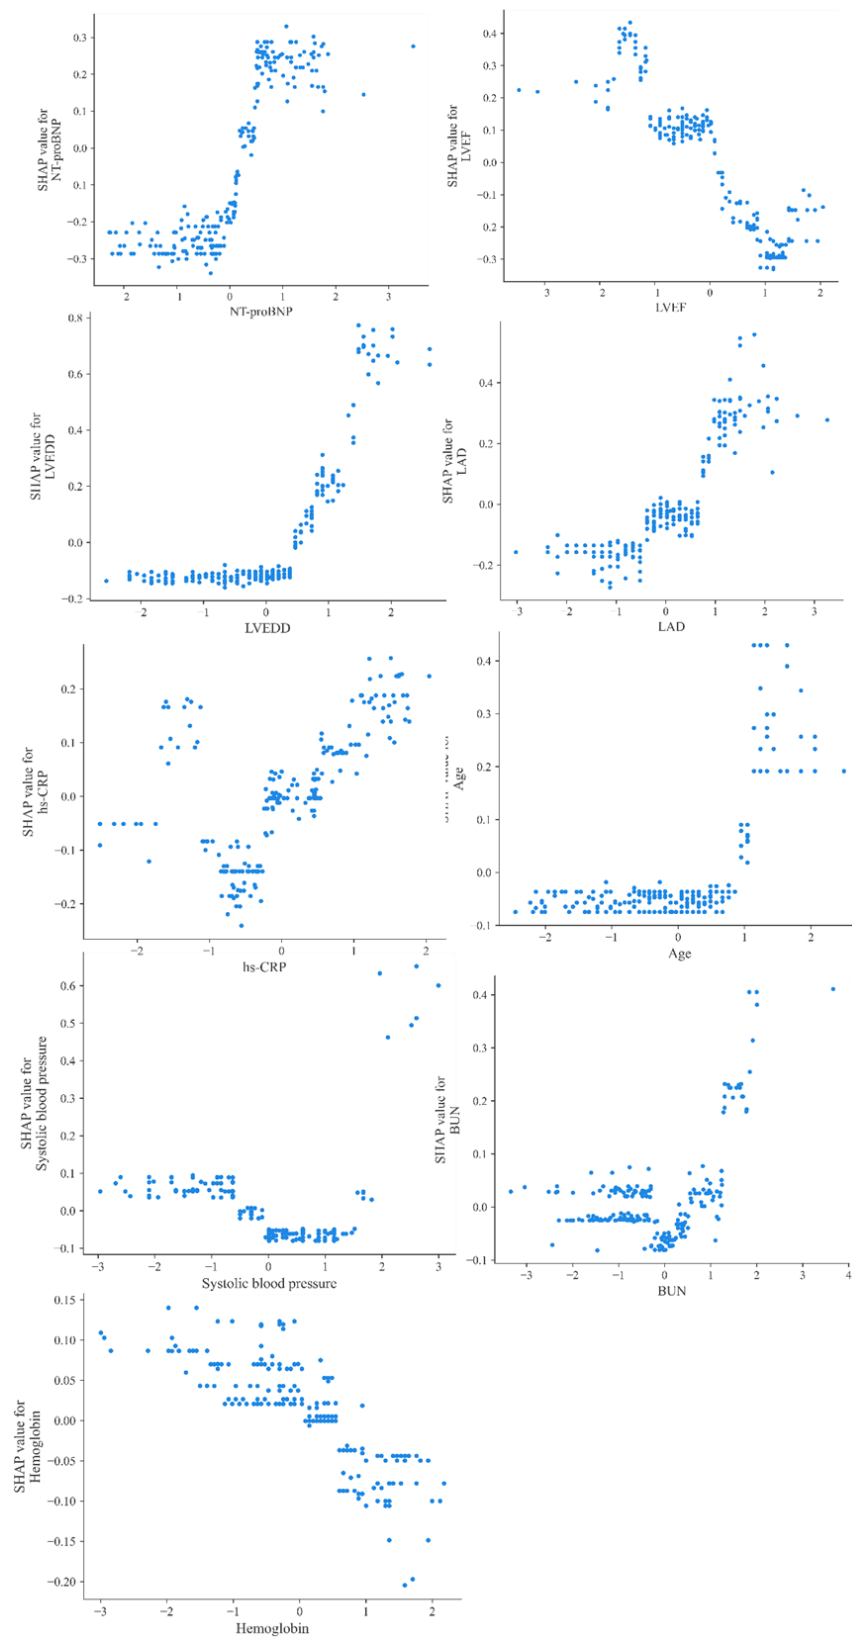

Abbreviations as in Supplemental Tables S1-4.

**Figure S2.** Continuous variables' contribution to the outcome in the SSVM model predicting the first appropriate shock.

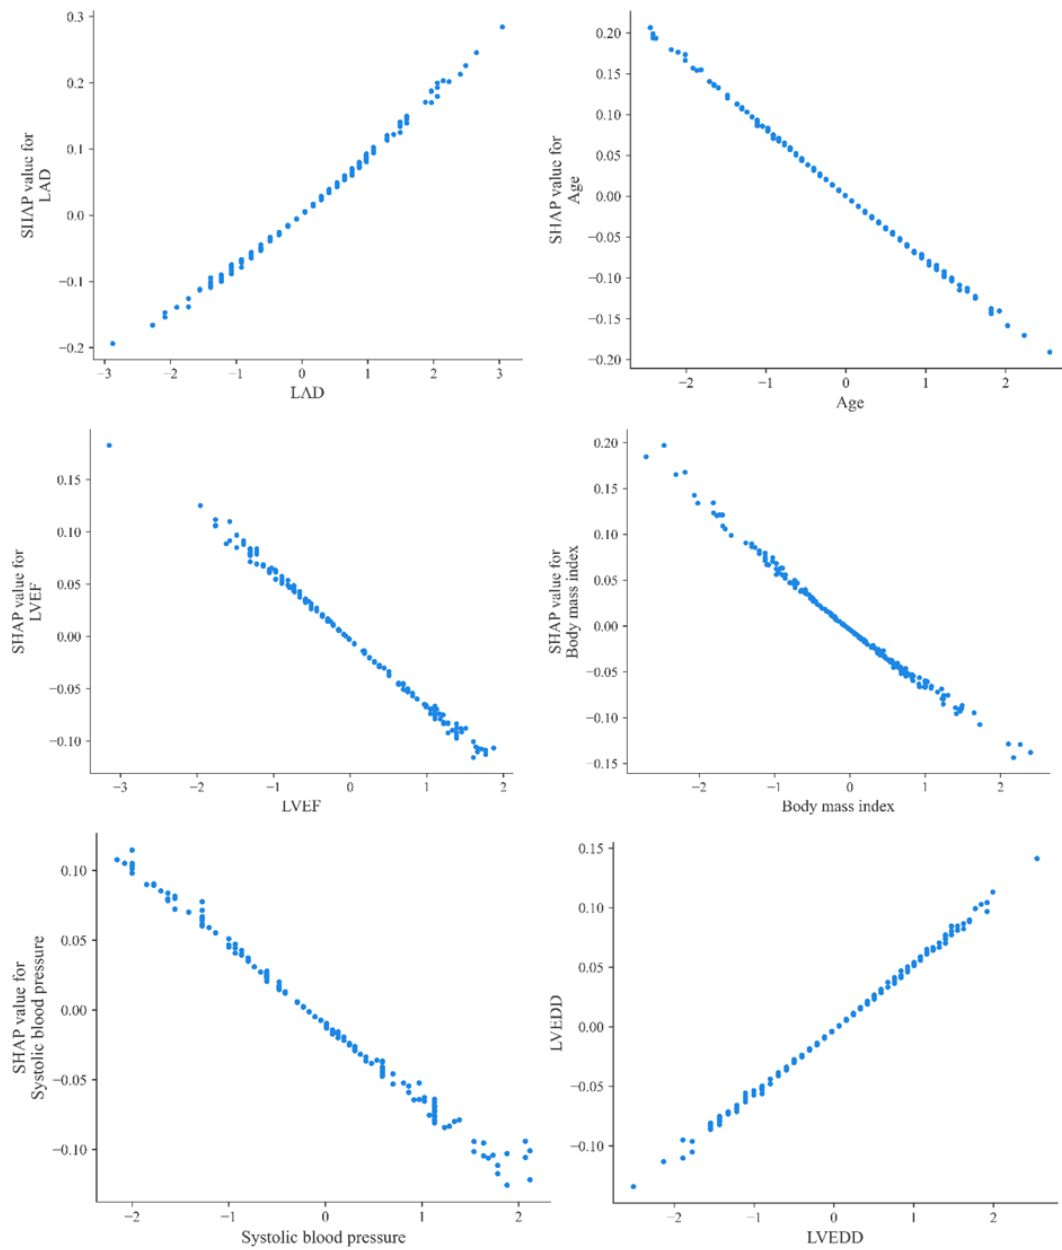

Abbreviations as in Supplemental Tables S1-4.

**Figure S3.** Model interpretability using SHAP values.

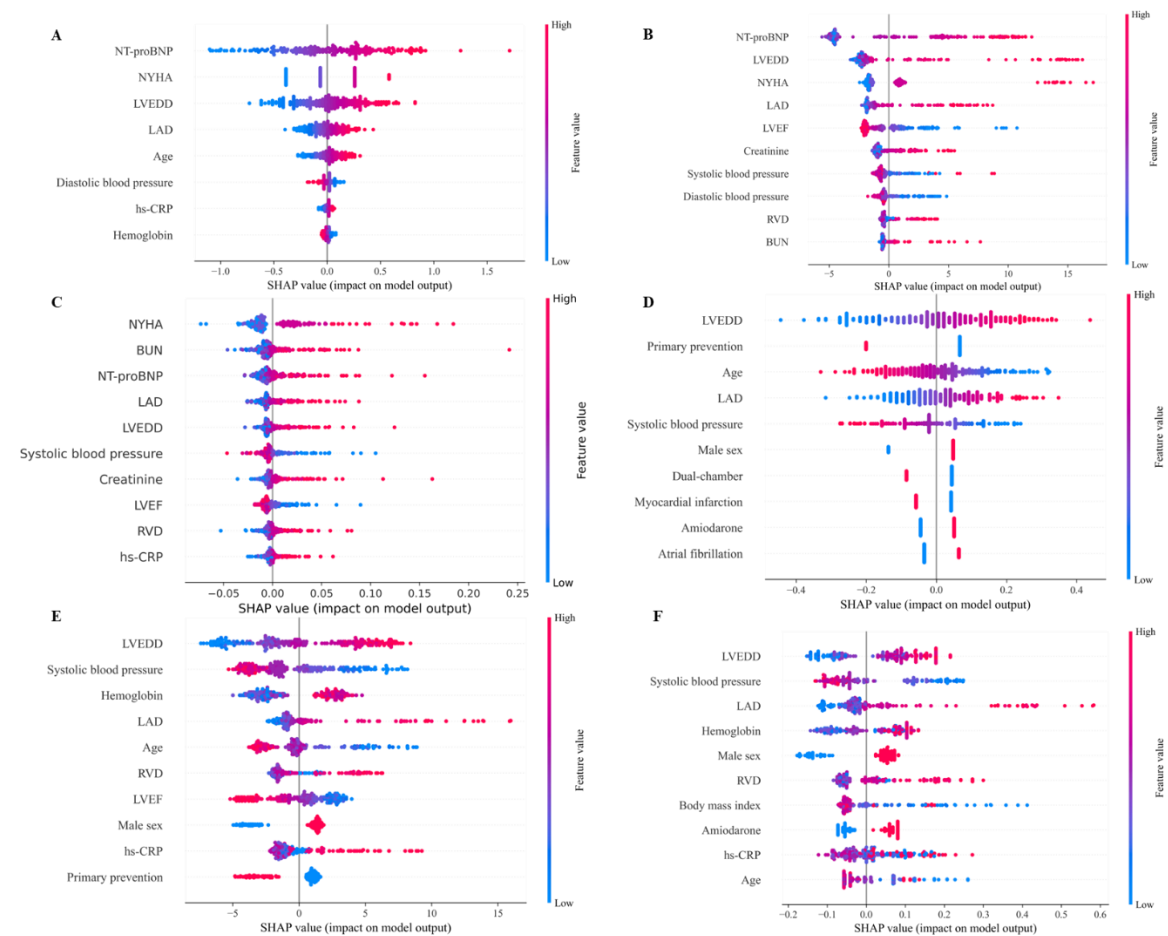

A-C respectively represents SHAP summary plot of EN-Cox, RSF, and SSVM model predicting death; D-F represents SHAP summary plot of EN-Cox, RSF, and XGboost model predicting shock.

SHAP, shapley additive explanation; other abbreviations as in Supplemental Tables S1-4.

**Figure S4.** Comparison of C-index between CPH and ML algorithms in sensitivity analysis.

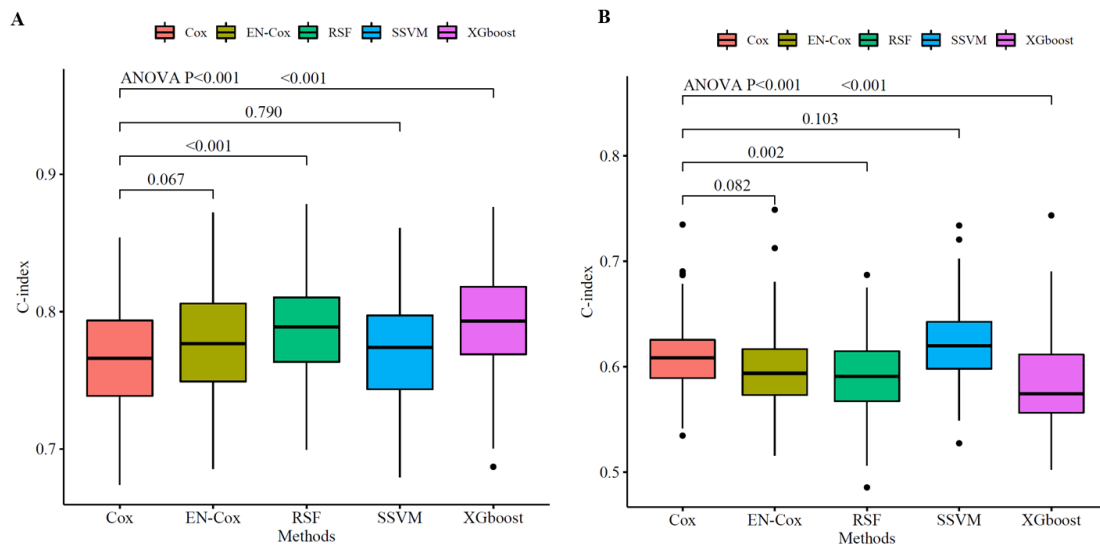

2A and 2B respectively display the comparison of C-index for all-cause death and first appropriate shock in the test set. For predicting all-cause death, the C-index of CPH, EN-Cox, RSF, SSVM, and XGboost were 0.765 (95% CI 0.755-0.773), 0.778 (95% CI 0.770-0.786), 0.787 (95% CI 0.780-0.794), 0.770 (95% CI 0.762-0.778), and 0.790 (95% CI 0.782-0.798), respectively. For predicting shock, the C-index of CPH, EN-Cox, RSF, SSVM, and XGboost were 0.610 (95% CI 0.603-0.617), 0.598 (95% CI 0.590-0.605), 0.591 (95% CI 0.584-0.599), 0.622 (95% CI 0.614-0.629), and 0.584 (95% CI 0.576-0.593), respectively.

CI, confidence interval; other abbreviations as in Supplemental Figure S3 and Table S3.

**Figure S5.** Model interpretability using SHAP values in sensitivity analysis.

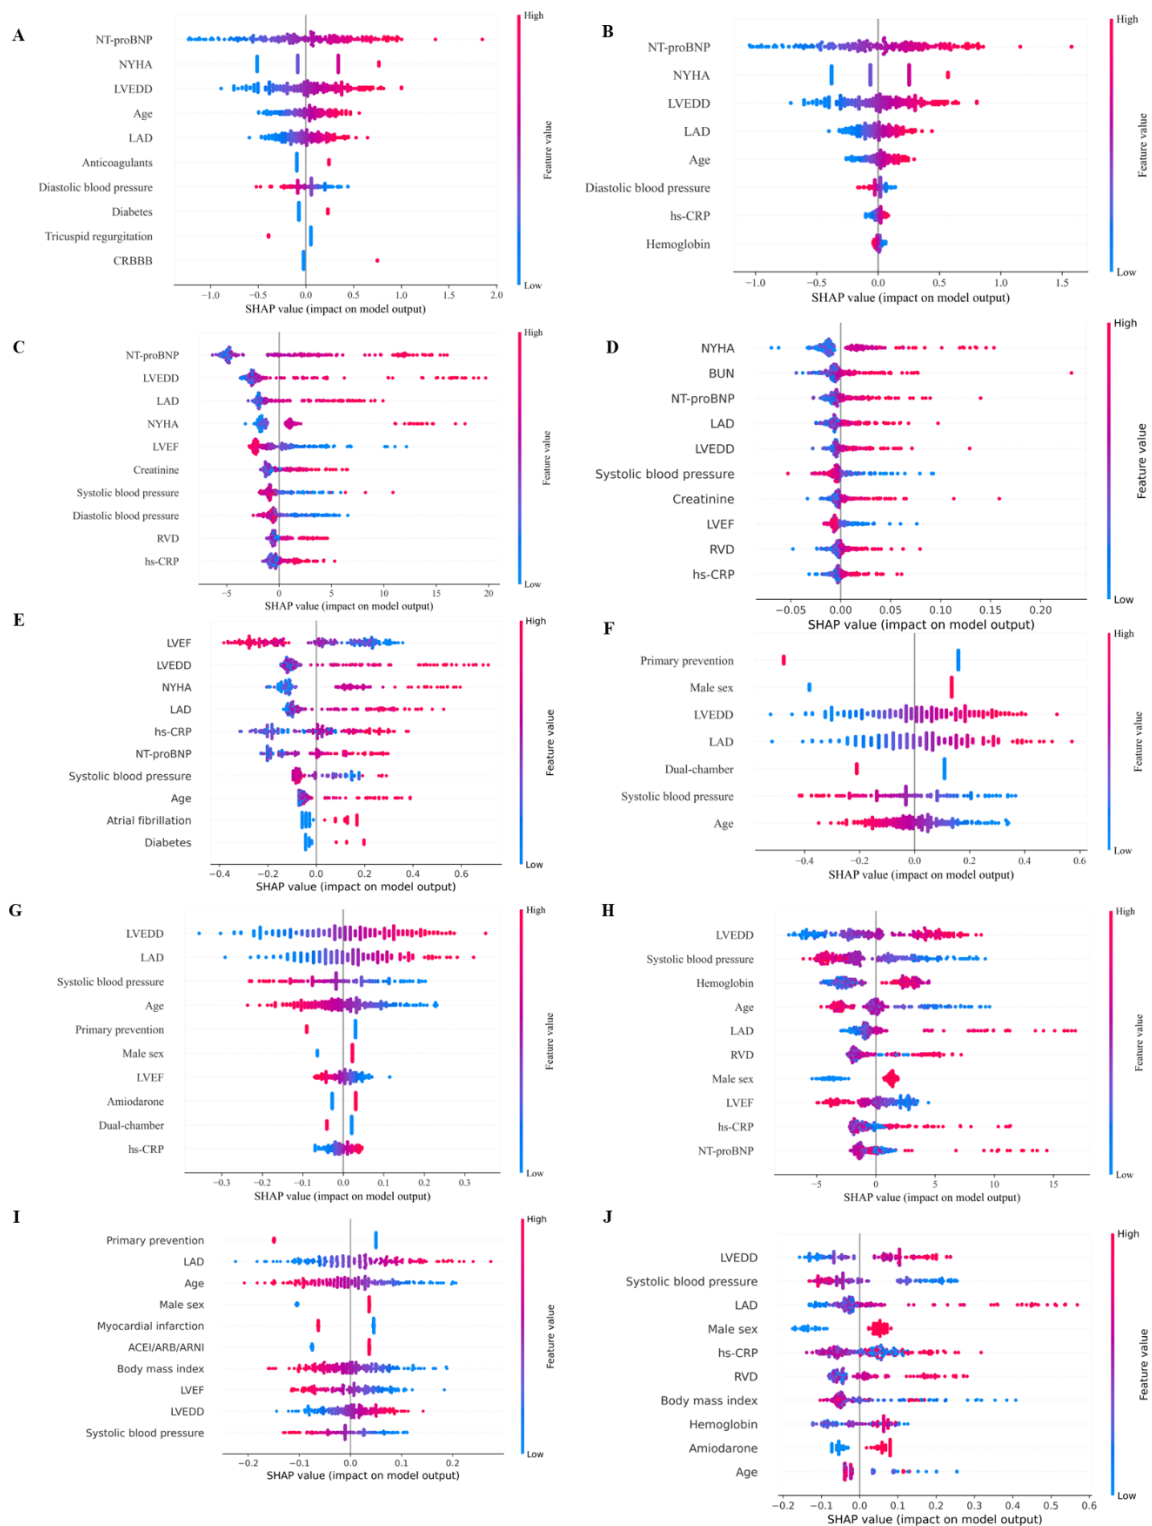

A-E represent SHAP summary plots of CPH, EN-Cox, RSF, SSVM, and XGboost model predicting death; F-J represent SHAP summary plots of CPH, EN-Cox, RSF, SSVM, and XGboost model predicting shock.

Abbreviations as in Supplemental Figure S3, Tables S1-4.
